# Supplementary material for: Molecular Evolution of Histone Methylation Modification Families in the Plant Kingdom and Their Genome-Wide Analysis in Barley
Source: MDPI journal article supplement (doi:10.3390/ijms24098043), 2023-04-28
Supplement: s1 [file s1]

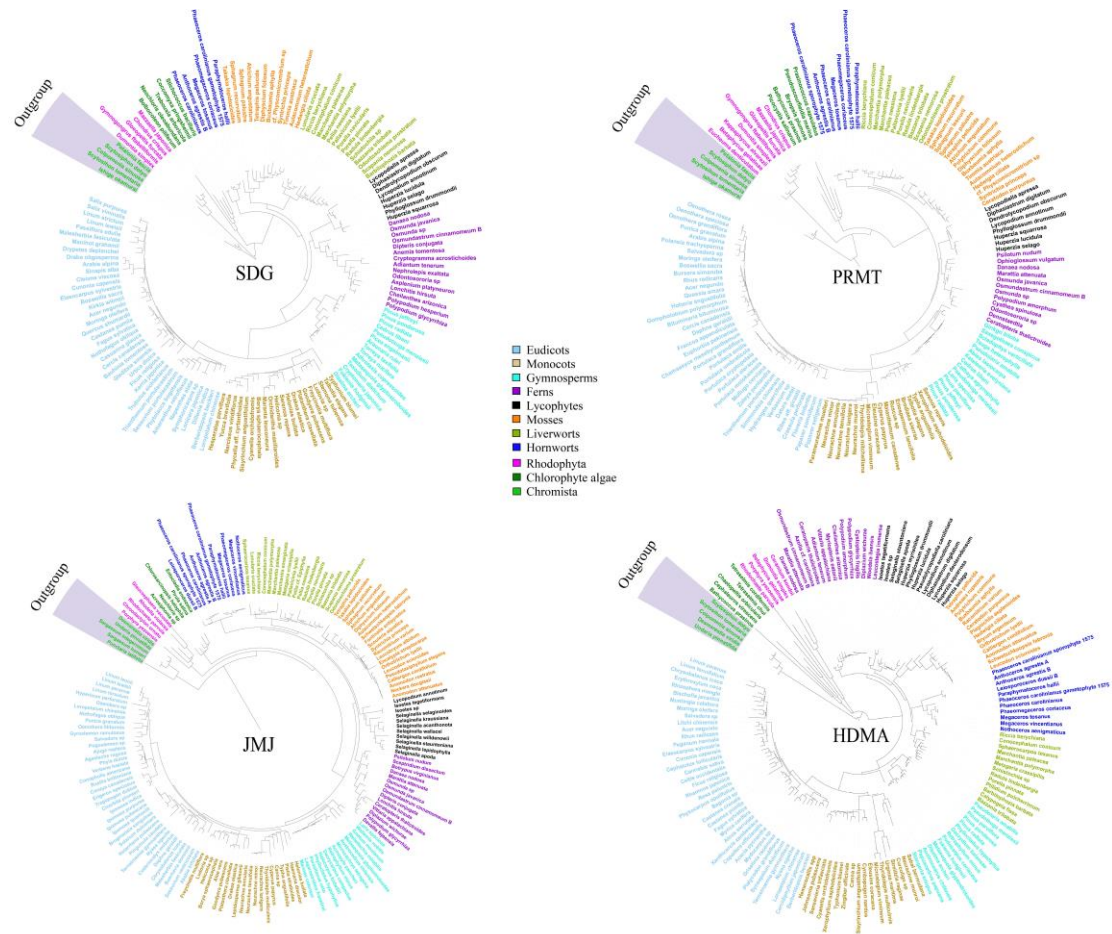

**Figure S1.** Evolutionary analysis of *HMT* (SDG, PRMT) and *HDM* (JMJ, HDMA) in representative species of the major lineage of green plants. *HMT*: Histone methyltransferases, *SDG*: SET domain group, *PRMT*: protein arginine methyltransferases, *HDM*: Histone demethylases, *HDMA*: SWIRM and C-terminal domain, *JMJ*: JmjC domain-containing proteins.

# PRMT

Tree scale: 1

Colored ranges

I

II

PrrA  
PRMT5  
PRMT5\_TIM  
PRMT5\_C  
zf-C2H2\_2  
Methyltransf\_25

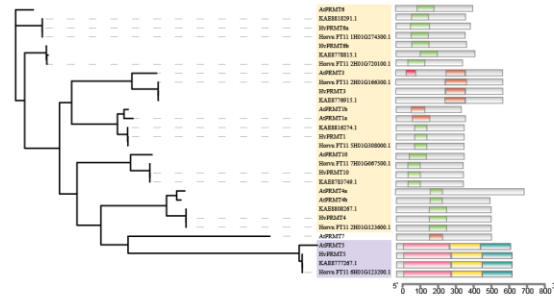

# JMJ

Tree scale: 1

Colored ranges

KDM5  
KDM3  
JMJD6  
JmjC-only  
KDM4

JmjC  
FYRC  
JmjN  
zf-C5HC2  
FYRN  
Plasmodium\_HRP  
PLI-1  
PHD  
ARID  
zf-RING\_2  
SPICE  
zf-H2C2\_2  
WRC  
cupin\_RmlC-like  
zf-4CXXC\_R1  
SRBM\_C  
DUF5401  
Bactofilin  
Cupin\_5  
F-box-like  
APH

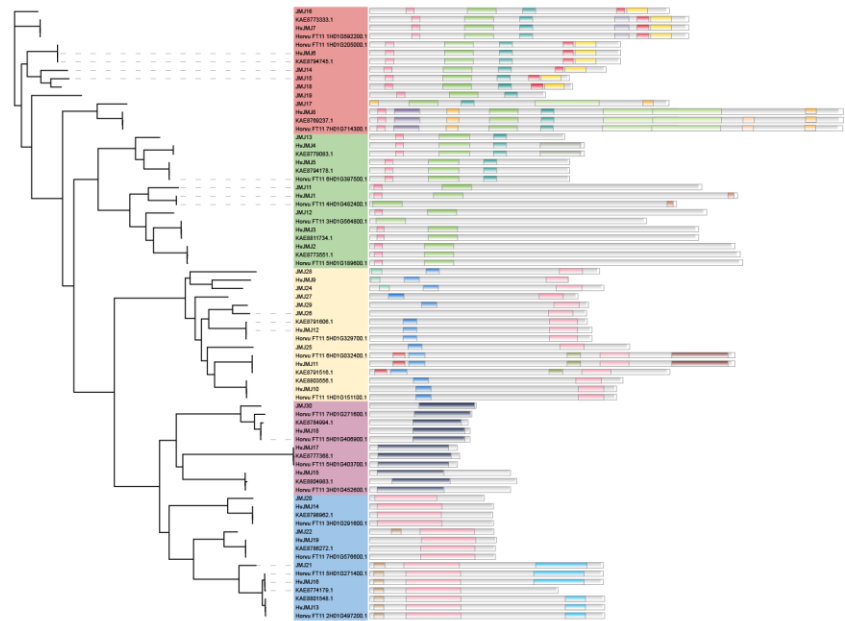

# HDMA

Tree scale: 1

Colored ranges

LDL2-like  
LDL3-like  
FLD-like  
LDL1-like

Amino\_oxidase  
SWIRM

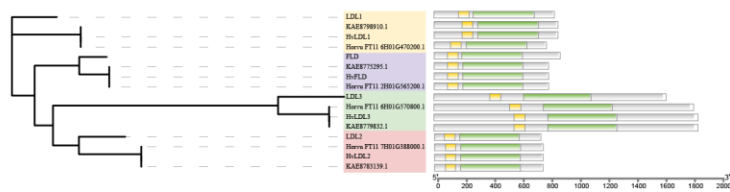

**Figure S2.** Phylogenetic and Conserved Domain Analysis of *PRMT*, *JMJ* and *HDMA*

bioRxiv preprint doi: <https://doi.org/10.1101/000000>; this version posted January 1, 2016. The copyright holder for this preprint (which was not certified by peer review) is the author/funder, who has granted bioRxiv a license to display the preprint in perpetuity. It is made available under aCC-BY-NC-ND 4.0 International license.

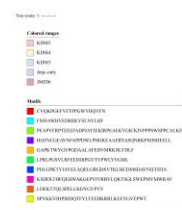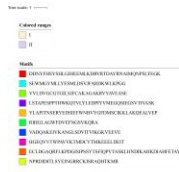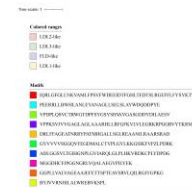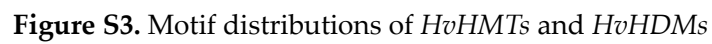

## Morex

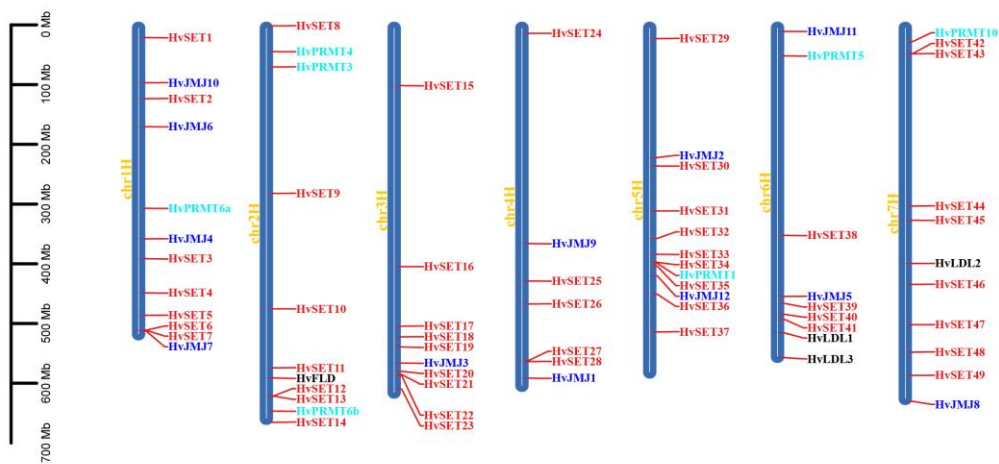

## B1K-04-12

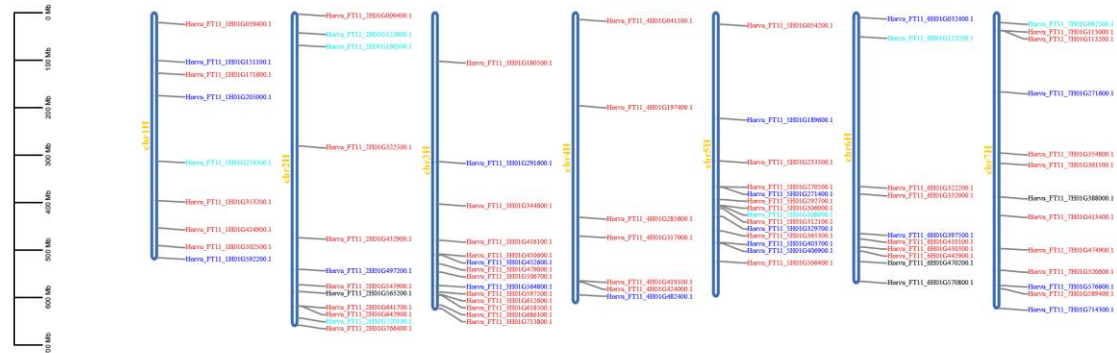

## OUN333

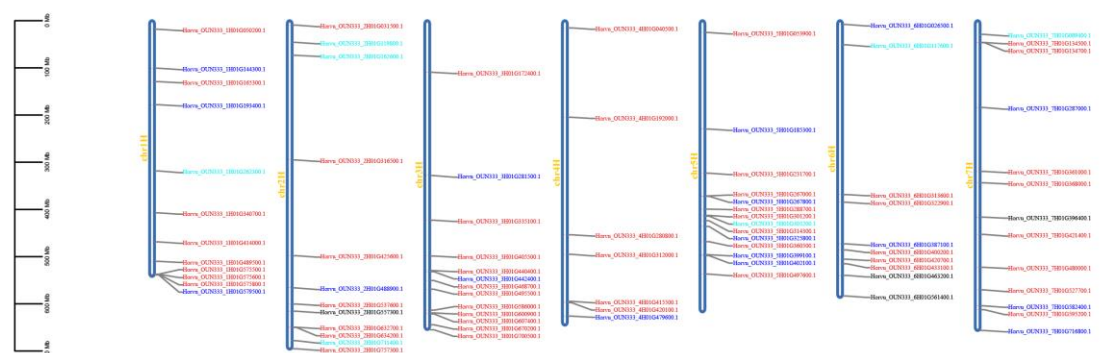

**Figure S4.** Chromosomal location analysis of *HMT* (*SDG*, *PRMT*) and *HDM* (*JMJ*, *HDMA*) families in different germplasms of barley. The red font is the *SDG* subfamily gene, the turquoise font is the *PRMT* subfamily gene, the blue font is the *JMJ* subfamily gene, and the black font is the *HDMA* subfamily gene
