# Supplementary material for: Molecular Evolution of Histone Methylation Modification Families in the Plant Kingdom and Their Genome-Wide Analysis in Barley
Source: Int J Mol Sci. 2023 Apr 28;24(9):8043. doi: 10.3390/ijms24098043 (PMC10178440; doi:10.3390/ijms24098043)
Supplement: Supplementary file 1 [file ijms-24-08043-s001.zip]

Archive with 7 entries (7 files):
- FigureS1.jpg
- FigureS2.tif
- FigureS3.jpg
- FigureS4.jpg
- Supplementary Materials-Figures.docx
- Supplementary Materials-Figures.pdf
- Supplementary Materials-Tables.xlsx
