# Supplementary material for: Molecular Evolution of Histone Methylation Modification Families in the Plant Kingdom and Their Genome-Wide Analysis in Barley
Source: Int J Mol Sci. 2023 Apr 28;24(9):8043. doi: 10.3390/ijms24098043 (PMC10178440; doi:10.3390/ijms24098043)
Supplement: Supplementary file 1 [file ijms-24-08043-s001.zip › Supplementary Materials-Tables.xlsx]

## Sheet: Table S1
					Table S1. Members of HMT and HDM families in different germplasms of barley
						Akashinriki	B1K-04-12	Barke	Golden_Promise	Hockett	HOR_10350	HOR_13821	HOR_13942	HOR_21599	HOR_3081	HOR_3365	HOR_7552	HOR_8148	HOR_9043	Igri	Morex	OUN333	RGT_Planet	ZDM01467	ZDM02064	Hordeum vulgare L. var. nudum
					SDG	Horvu_AKASHIN_1H01G051900.1	Horvu_FT11_1H01G059400.1	Horvu_BARKE_1H01G057000.1	Horvu_GOLDEN_1H01G041100.1	Horvu_HOCKETT_1H01G047700.1	Horvu_10350_1H01G055000.1	Horvu_13821_1H01G052600.1	Horvu_13942_1H01G050100.1	Horvu_21599_1H01G050500.1	Horvu_3081_1H01G049600.1	Horvu_HHOR_1H01G054400.1	Horvu_7552_1H01G054700.1	Horvu_8148_1H01G050600.1	Horvu_9043_1H01G051500.1	Horvu_IGRI_1H01G049900.1	HORVU.MOREX.r3.1HG0008950.1	Horvu_OUN333_1H01G050200.1	Horvu_PLANET_1H01G052500.1	Horvu_HUANG_1H01G045300.1	Horvu_CHIBA_1H01G045700.1	KAE8812063.1
						Horvu_AKASHIN_1H01G163500.1	Horvu_FT11_1H01G171600.1	Horvu_BARKE_1H01G174300.1	Horvu_GOLDEN_1H01G136000.1	Horvu_HOCKETT_1H01G158500.1	Horvu_10350_1H01G169300.1	Horvu_13821_1H01G162900.1	Horvu_13942_1H01G161400.1	Horvu_21599_1H01G160900.1	Horvu_3081_1H01G163100.1	Horvu_HHOR_1H01G166300.1	Horvu_7552_1H01G166000.1	Horvu_8148_1H01G163200.1	Horvu_9043_1H01G164700.1	Horvu_IGRI_1H01G162700.1	HORVU.MOREX.r3.1HG0027530.1	Horvu_OUN333_1H01G165300.1	Horvu_PLANET_1H01G168400.1	Horvu_HUANG_1H01G156600.1	Horvu_CHIBA_1H01G150600.1	KAE8805116.1
						Horvu_AKASHIN_1H01G341800.1	Horvu_FT11_1H01G353200.1	Horvu_BARKE_1H01G358000.1	Horvu_GOLDEN_1H01G302900.1	Horvu_HOCKETT_1H01G330100.1	Horvu_10350_1H01G350900.1	Horvu_13821_1H01G340900.1	Horvu_13942_1H01G337600.1	Horvu_21599_1H01G338700.1	Horvu_3081_1H01G346800.1	Horvu_HHOR_1H01G341000.1	Horvu_7552_1H01G345800.1	Horvu_8148_1H01G342500.1	Horvu_9043_1H01G342900.1	Horvu_IGRI_1H01G341200.1	HORVU.MOREX.r3.1HG0058810.1	Horvu_OUN333_1H01G340700.1	Horvu_PLANET_1H01G348800.1	Horvu_HUANG_1H01G329100.1	Horvu_CHIBA_1H01G328900.1	KAE8800743.1
						Horvu_AKASHIN_1H01G415600.1	Horvu_FT11_1H01G424900.1	Horvu_BARKE_1H01G431100.1	Horvu_GOLDEN_1H01G371300.1	Horvu_HOCKETT_1H01G402500.1	Horvu_10350_1H01G425200.1	Horvu_13821_1H01G413800.1	Horvu_13942_1H01G411600.1	Horvu_21599_1H01G411100.1	Horvu_3081_1H01G421000.1	Horvu_HHOR_1H01G413000.1	Horvu_7552_1H01G418600.1	Horvu_8148_1H01G415500.1	Horvu_9043_1H01G415900.1	Horvu_IGRI_1H01G415100.1	HORVU.MOREX.r3.1HG0069800.1	Horvu_OUN333_1H01G414000.1	Horvu_PLANET_1H01G421700.1	Horvu_HUANG_1H01G402400.1	Horvu_CHIBA_1H01G403100.1	KAE8797648.1
						Horvu_AKASHIN_1H01G493000.1	Horvu_FT11_1H01G502500.1	Horvu_BARKE_1H01G509200.1	Horvu_GOLDEN_1H01G443800.1	Horvu_HOCKETT_1H01G478600.1	Horvu_10350_1H01G503400.1	Horvu_13821_1H01G490200.1	Horvu_13942_1H01G485900.1	Horvu_21599_1H01G486400.1	Horvu_3081_1H01G497000.1	Horvu_HHOR_1H01G489300.1	Horvu_7552_1H01G497100.1	Horvu_8148_1H01G493000.1	Horvu_9043_1H01G491700.1	Horvu_IGRI_1H01G490600.1	HORVU.MOREX.r3.1HG0080510.1	Horvu_OUN333_1H01G489500.1	Horvu_PLANET_1H01G499100.1	Horvu_HUANG_1H01G479100.1	Horvu_CHIBA_1H01G478600.1	KAE8803036.1
						Horvu_AKASHIN_1H01G578200.1	Horvu_FT11_2H01G009400.1	Horvu_BARKE_1H01G596700.1	Horvu_GOLDEN_1H01G526500.1	Horvu_HOCKETT_2H01G006000.1	Horvu_10350_1H01G591800.1	Horvu_13821_1H01G578100.1	Horvu_13942_1H01G571900.1	Horvu_21599_1H01G572900.1	Horvu_3081_1H01G582600.1	Horvu_HHOR_1H01G576700.1	Horvu_7552_1H01G578100.1	Horvu_8148_1H01G578400.1	Horvu_9043_1H01G577400.1	Horvu_IGRI_2H01G003800.1	HORVU.MOREX.r3.1HG0093330.1	Horvu_OUN333_1H01G575500.1	Horvu_PLANET_1H01G584700.1	Horvu_HUANG_1H01G564100.1	Horvu_CHIBA_1H01G563600.1	KAE8803081.1
						Horvu_AKASHIN_2H01G005800.1	Horvu_FT11_2H01G322500.1	Horvu_BARKE_1H01G596900.1	Horvu_GOLDEN_2H01G004400.1	Horvu_HOCKETT_2H01G303100.1	Horvu_10350_2H01G006200.1	Horvu_13821_1H01G578300.1	Horvu_13942_2H01G005500.1	Horvu_21599_1H01G573100.1	Horvu_3081_2H01G003600.1	Horvu_HHOR_2H01G006000.1	Horvu_7552_1H01G578300.1	Horvu_8148_1H01G578600.1	Horvu_9043_1H01G577600.1	Horvu_IGRI_2H01G321300.1	HORVU.MOREX.r3.1HG0093350.1	Horvu_OUN333_1H01G575600.1	Horvu_PLANET_2H01G004000.1	Horvu_HUANG_2H01G006100.1	Horvu_CHIBA_1H01G563800.1	KAE8790876.1
						Horvu_AKASHIN_2H01G319300.1	Horvu_FT11_2H01G432900.1	Horvu_BARKE_2H01G007600.1	Horvu_GOLDEN_2H01G291800.1	Horvu_HOCKETT_2H01G409400.1	Horvu_10350_2H01G326800.1	Horvu_13821_2H01G006600.1	Horvu_13942_2H01G319100.1	Horvu_21599_2H01G005600.1	Horvu_3081_2H01G321100.1	Horvu_HHOR_2H01G316400.1	Horvu_7552_2H01G001000.1	Horvu_8148_2H01G005200.1	Horvu_9043_2H01G005500.1	Horvu_IGRI_2H01G428700.1	HORVU.MOREX.r3.2HG0096180.1	Horvu_OUN333_1H01G575800.1	Horvu_PLANET_2H01G323200.1	Horvu_HUANG_2H01G313500.1	Horvu_CHIBA_2H01G318400.1	KAE8813659.1
						Horvu_AKASHIN_2H01G428900.1	Horvu_FT11_2H01G545900.1	Horvu_BARKE_2H01G330600.1	Horvu_GOLDEN_2H01G390900.1	Horvu_HOCKETT_2H01G516100.1	Horvu_10350_2H01G434100.1	Horvu_13821_2H01G321200.1	Horvu_13942_2H01G427700.1	Horvu_21599_2H01G319200.1	Horvu_3081_2H01G428200.1	Horvu_HHOR_2H01G421200.1	Horvu_7552_2H01G323200.1	Horvu_8148_2H01G322900.1	Horvu_9043_2H01G323700.1	Horvu_IGRI_2H01G540600.1	HORVU.MOREX.r3.2HG0146930.1	Horvu_OUN333_2H01G031500.1	Horvu_PLANET_2H01G431900.1	Horvu_HUANG_2H01G422200.1	Horvu_CHIBA_2H01G427300.1	KAE8787630.1
						Horvu_AKASHIN_2H01G541100.1	Horvu_FT11_2H01G641700.1	Horvu_BARKE_2H01G436700.1	Horvu_GOLDEN_2H01G499800.1	Horvu_HOCKETT_2H01G606700.1	Horvu_10350_2H01G546100.1	Horvu_13821_2H01G427500.1	Horvu_13942_2H01G540100.1	Horvu_21599_2H01G427300.1	Horvu_3081_2H01G541400.1	Horvu_HHOR_2H01G535600.1	Horvu_7552_2H01G429400.1	Horvu_8148_2H01G429000.1	Horvu_9043_2H01G431000.1	Horvu_IGRI_2H01G636700.1	HORVU.MOREX.r3.2HG0168260.1	Horvu_OUN333_2H01G316500.1	Horvu_PLANET_2H01G543400.1	Horvu_HUANG_2H01G535100.1	Horvu_CHIBA_2H01G541200.1	KAE8804762.1
						Horvu_AKASHIN_2H01G637500.1	Horvu_FT11_2H01G642900.1	Horvu_BARKE_2H01G549400.1	Horvu_GOLDEN_2H01G590900.1	Horvu_HOCKETT_2H01G608300.1	Horvu_10350_2H01G642100.1	Horvu_13821_2H01G540400.1	Horvu_13942_2H01G634700.1	Horvu_21599_2H01G539600.1	Horvu_3081_2H01G637800.1	Horvu_HHOR_2H01G630800.1	Horvu_7552_2H01G542000.1	Horvu_8148_2H01G541000.1	Horvu_9043_2H01G541400.1	Horvu_IGRI_2H01G638500.1	HORVU.MOREX.r3.2HG0185400.1	Horvu_OUN333_2H01G425600.1	Horvu_PLANET_2H01G639000.1	Horvu_HUANG_2H01G630500.1	Horvu_CHIBA_2H01G635400.1	KAE8787579.1
						Horvu_AKASHIN_2H01G638900.1	Horvu_FT11_2H01G766400.1	Horvu_BARKE_2H01G648400.1	Horvu_GOLDEN_2H01G592800.1	Horvu_HOCKETT_2H01G735700.1	Horvu_10350_2H01G643700.1	Horvu_13821_2H01G634900.1	Horvu_13942_2H01G636100.1	Horvu_21599_2H01G634600.1	Horvu_3081_2H01G639700.1	Horvu_HHOR_2H01G632300.1	Horvu_7552_2H01G637000.1	Horvu_8148_2H01G634900.1	Horvu_9043_2H01G638800.1	Horvu_IGRI_2H01G762700.1	HORVU.MOREX.r3.2HG0198730.1	Horvu_OUN333_2H01G537600.1	Horvu_PLANET_2H01G640400.1	Horvu_HUANG_2H01G632000.1	Horvu_CHIBA_2H01G636900.1	KAE8810838.1
						Horvu_AKASHIN_2H01G764500.1	Horvu_FT11_3H01G180500.1	Horvu_BARKE_2H01G650100.1	Horvu_GOLDEN_3H01G158900.1	Horvu_HOCKETT_3H01G166000.1	Horvu_10350_2H01G778500.1	Horvu_13821_2H01G636600.1	Horvu_13942_2H01G749800.1	Horvu_21599_2H01G636500.1	Horvu_3081_2H01G772900.1	Horvu_HHOR_2H01G762200.1	Horvu_7552_2H01G638300.1	Horvu_8148_2H01G636700.1	Horvu_9043_2H01G640300.1	Horvu_IGRI_3H01G168700.1	HORVU.MOREX.r3.2HG0199050.1	Horvu_OUN333_2H01G632700.1	Horvu_PLANET_2H01G773600.1	Horvu_HUANG_2H01G757700.1	Horvu_CHIBA_2H01G768200.1	KAE8813305.1
						Horvu_AKASHIN_3H01G171300.1	Horvu_FT11_3H01G344600.1	Horvu_BARKE_2H01G777300.1	Horvu_GOLDEN_3H01G315700.1	Horvu_HOCKETT_3H01G326300.1	Horvu_10350_3H01G172800.1	Horvu_13821_2H01G754200.1	Horvu_13942_3H01G171800.1	Horvu_21599_2H01G764600.1	Horvu_3081_3H01G170200.1	Horvu_HHOR_3H01G172500.1	Horvu_7552_3H01G172700.1	Horvu_8148_2H01G765300.1	Horvu_9043_2H01G760000.1	Horvu_IGRI_3H01G331600.1	HORVU.MOREX.r3.2HG0218020.1	Horvu_OUN333_2H01G634200.1	Horvu_PLANET_3H01G177400.1	Horvu_HUANG_3H01G163600.1	Horvu_CHIBA_3H01G168300.1	KAE8790962.1
						Horvu_AKASHIN_3H01G338600.1	Horvu_FT11_3H01G416100.1	Horvu_BARKE_3H01G176300.1	Horvu_GOLDEN_3H01G382500.1	Horvu_HOCKETT_3H01G394400.1	Horvu_10350_3H01G336400.1	Horvu_13821_3H01G173600.1	Horvu_13942_3H01G333900.1	Horvu_21599_3H01G176000.1	Horvu_3081_3H01G332300.1	Horvu_HHOR_3H01G333500.1	Horvu_7552_3H01G339600.1	Horvu_8148_3H01G176300.1	Horvu_9043_3H01G167300.1	Horvu_IGRI_3H01G399700.1	HORVU.MOREX.r3.3HG0244900.1	Horvu_OUN333_2H01G757300.1	Horvu_PLANET_3H01G342400.1	Horvu_HUANG_3H01G327100.1	Horvu_CHIBA_3H01G332900.1	KAE8805650.1
						Horvu_AKASHIN_3H01G405600.1	Horvu_FT11_3H01G450600.1	Horvu_BARKE_3H01G339500.1	Horvu_GOLDEN_3H01G416600.1	Horvu_HOCKETT_3H01G427400.1	Horvu_10350_3H01G406500.1	Horvu_13821_3H01G332200.1	Horvu_13942_3H01G403700.1	Horvu_21599_3H01G339000.1	Horvu_3081_3H01G400900.1	Horvu_HHOR_3H01G402400.1	Horvu_7552_3H01G408200.1	Horvu_8148_3H01G338500.1	Horvu_9043_3H01G330300.1	Horvu_IGRI_3H01G435000.1	HORVU.MOREX.r3.3HG0276610.1	Horvu_OUN333_3H01G172400.1	Horvu_PLANET_3H01G411100.1	Horvu_HUANG_3H01G395300.1	Horvu_CHIBA_3H01G400200.1	KAE8791329.1
						Horvu_AKASHIN_3H01G439600.1	Horvu_FT11_3H01G479000.1	Horvu_BARKE_3H01G408200.1	Horvu_GOLDEN_3H01G443200.1	Horvu_HOCKETT_3H01G454700.1	Horvu_10350_3H01G441200.1	Horvu_13821_3H01G401700.1	Horvu_13942_3H01G436900.1	Horvu_21599_3H01G443100.1	Horvu_3081_3H01G434900.1	Horvu_HHOR_3H01G435500.1	Horvu_7552_3H01G442300.1	Horvu_8148_3H01G407800.1	Horvu_9043_3H01G402600.1	Horvu_IGRI_3H01G462600.1	HORVU.MOREX.r3.3HG0292400.1	Horvu_OUN333_3H01G335100.1	Horvu_PLANET_3H01G445700.1	Horvu_HUANG_3H01G431300.1	Horvu_CHIBA_3H01G434500.1	KAE8766654.1
						Horvu_AKASHIN_3H01G467400.1	Horvu_FT11_3H01G506700.1	Horvu_BARKE_3H01G441500.1	Horvu_GOLDEN_3H01G550200.1	Horvu_HOCKETT_3H01G482100.1	Horvu_10350_3H01G468400.1	Horvu_13821_3H01G435900.1	Horvu_13942_3H01G465200.1	Horvu_21599_3H01G470400.1	Horvu_3081_3H01G462900.1	Horvu_HHOR_3H01G463300.1	Horvu_7552_3H01G471300.1	Horvu_8148_3H01G441400.1	Horvu_9043_3H01G433400.1	Horvu_IGRI_3H01G490300.1	HORVU.MOREX.r3.3HG0296030.1	Horvu_OUN333_3H01G405500.1	Horvu_PLANET_3H01G473000.1	Horvu_HUANG_3H01G458000.1	Horvu_CHIBA_3H01G462300.1	KAE8781457.1
						Horvu_AKASHIN_3H01G494900.1	Horvu_FT11_3H01G597500.1	Horvu_BARKE_3H01G468900.1	Horvu_GOLDEN_3H01G562100.1	Horvu_HOCKETT_3H01G569700.1	Horvu_10350_3H01G496200.1	Horvu_13821_3H01G463500.1	Horvu_13942_3H01G493500.1	Horvu_21599_3H01G498000.1	Horvu_3081_3H01G490100.1	Horvu_HHOR_3H01G576200.1	Horvu_7552_3H01G499400.1	Horvu_8148_3H01G469300.1	Horvu_9043_3H01G460600.1	Horvu_IGRI_3H01G578000.1	HORVU.MOREX.r3.3HG0299940.1	Horvu_OUN333_3H01G440400.1	Horvu_PLANET_3H01G499800.1	Horvu_HUANG_3H01G485800.1	Horvu_CHIBA_3H01G488700.1	KAE8775742.1
						Horvu_AKASHIN_3H01G583100.1	Horvu_FT11_3H01G612600.1	Horvu_BARKE_3H01G496300.1	Horvu_GOLDEN_3H01G568700.1	Horvu_HOCKETT_3H01G583800.1	Horvu_10350_3H01G587200.1	Horvu_13821_3H01G581100.1	Horvu_13942_3H01G581400.1	Horvu_21599_3H01G586900.1	Horvu_3081_3H01G594500.1	Horvu_HHOR_3H01G596600.1	Horvu_7552_3H01G589200.1	Horvu_8148_3H01G496400.1	Horvu_9043_3H01G488200.1	Horvu_IGRI_3H01G592800.1	HORVU.MOREX.r3.3HG0312220.1	Horvu_OUN333_3H01G468700.1	Horvu_PLANET_3H01G590200.1	Horvu_HUANG_3H01G573500.1	Horvu_CHIBA_3H01G577600.1	KAE8766817.1
						Horvu_AKASHIN_3H01G597700.1	Horvu_FT11_3H01G618500.1	Horvu_BARKE_3H01G586400.1	Horvu_GOLDEN_3H01G624100.1	Horvu_HOCKETT_3H01G590600.1	Horvu_10350_3H01G600800.1	Horvu_13821_3H01G594500.1	Horvu_13942_3H01G596400.1	Horvu_21599_3H01G601600.1	Horvu_3081_3H01G600000.1	Horvu_HHOR_3H01G660100.1	Horvu_7552_3H01G604500.1	Horvu_8148_3H01G585500.1	Horvu_9043_3H01G579900.1	Horvu_IGRI_3H01G599300.1	HORVU.MOREX.r3.3HG0314220.1	Horvu_OUN333_3H01G495500.1	Horvu_PLANET_3H01G605800.1	Horvu_HUANG_3H01G588000.1	Horvu_CHIBA_3H01G592100.1	KAE8807749.1
						Horvu_AKASHIN_3H01G604000.1	Horvu_FT11_3H01G686100.1	Horvu_BARKE_3H01G600500.1	Horvu_GOLDEN_4H01G032400.1	Horvu_HOCKETT_3H01G657600.1	Horvu_10350_3H01G607100.1	Horvu_13821_3H01G600600.1	Horvu_13942_3H01G602000.1	Horvu_21599_3H01G608400.1	Horvu_3081_3H01G666200.1	Horvu_HHOR_3H01G660200.1	Horvu_7552_3H01G611200.1	Horvu_8148_3H01G600100.1	Horvu_9043_3H01G593700.1	Horvu_IGRI_3H01G665400.1	HORVU.MOREX.r3.3HG0315050.1	Horvu_OUN333_3H01G586000.1	Horvu_PLANET_3H01G611500.1	Horvu_HUANG_3H01G593100.1	Horvu_CHIBA_3H01G598200.1	KAE8767927.1
						Horvu_AKASHIN_3H01G666100.1	Horvu_FT11_3H01G713800.1	Horvu_BARKE_3H01G607200.1	Horvu_GOLDEN_4H01G173900.1	Horvu_HOCKETT_3H01G684200.1	Horvu_10350_3H01G674400.1	Horvu_13821_3H01G672400.1	Horvu_13942_3H01G662600.1	Horvu_21599_3H01G671900.1	Horvu_3081_4H01G037400.1	Horvu_HHOR_4H01G040100.1	Horvu_7552_3H01G677100.1	Horvu_8148_3H01G606700.1	Horvu_9043_3H01G599000.1	Horvu_IGRI_4H01G039400.1	HORVU.MOREX.r3.3HG0325840.1	Horvu_OUN333_3H01G600900.1	Horvu_PLANET_3H01G677200.1	Horvu_HUANG_3H01G651900.1	Horvu_CHIBA_3H01G661900.1	KAE8811281.1
						Horvu_AKASHIN_3H01G698500.1	Horvu_FT11_4H01G041100.1	Horvu_BARKE_3H01G674000.1	Horvu_GOLDEN_4H01G259300.1	Horvu_HOCKETT_4H01G032700.1	Horvu_10350_3H01G708000.1	Horvu_13821_4H01G039200.1	Horvu_13942_4H01G043200.1	Horvu_21599_3H01G700400.1	Horvu_3081_4H01G189100.1	Horvu_HHOR_4H01G192100.1	Horvu_7552_3H01G706800.1	Horvu_8148_3H01G673000.1	Horvu_9043_3H01G667500.1	Horvu_IGRI_4H01G190900.1	HORVU.MOREX.r3.4HG0336430.1	Horvu_OUN333_3H01G607400.1	Horvu_PLANET_3H01G714300.1	Horvu_HUANG_4H01G030500.1	Horvu_CHIBA_3H01G687500.1	KAE8807730.1
						Horvu_AKASHIN_4H01G037400.1	Horvu_FT11_4H01G197400.1	Horvu_BARKE_3H01G710500.1	Horvu_GOLDEN_4H01G289700.1	Horvu_HOCKETT_4H01G179800.1	Horvu_10350_4H01G040900.1	Horvu_13821_4H01G191400.1	Horvu_13942_4H01G193600.1	Horvu_21599_4H01G040200.1	Horvu_3081_4H01G276700.1	Horvu_HHOR_4H01G281600.1	Horvu_7552_4H01G038200.1	Horvu_8148_3H01G704600.1	Horvu_9043_4H01G036600.1	Horvu_IGRI_4H01G279200.1	HORVU.MOREX.r3.4HG0382250.1	Horvu_OUN333_3H01G670200.1	Horvu_PLANET_4H01G037600.1	Horvu_HUANG_4H01G269200.1	Horvu_CHIBA_4H01G039500.1	KAE8806389.1
						Horvu_AKASHIN_4H01G188100.1	Horvu_FT11_4H01G285600.1	Horvu_BARKE_4H01G041600.1	Horvu_GOLDEN_4H01G387800.1	Horvu_HOCKETT_4H01G266300.1	Horvu_10350_4H01G192000.1	Horvu_13821_4H01G279300.1	Horvu_13942_4H01G282000.1	Horvu_21599_4H01G191800.1	Horvu_3081_4H01G308200.1	Horvu_HHOR_4H01G313100.1	Horvu_7552_4H01G188000.1	Horvu_8148_4H01G039300.1	Horvu_9043_4H01G187600.1	Horvu_IGRI_4H01G310800.1	HORVU.MOREX.r3.4HG0387030.1	Horvu_OUN333_3H01G700500.1	Horvu_PLANET_4H01G190000.1	Horvu_HUANG_4H01G300400.1	Horvu_CHIBA_4H01G188700.1	KAE8797960.1
						Horvu_AKASHIN_4H01G275700.1	Horvu_FT11_4H01G317000.1	Horvu_BARKE_4H01G191700.1	Horvu_GOLDEN_5H01G043700.1	Horvu_HOCKETT_4H01G298000.1	Horvu_10350_4H01G281000.1	Horvu_13821_4H01G310400.1	Horvu_13942_4H01G314400.1	Horvu_21599_4H01G280400.1	Horvu_3081_4H01G411200.1	Horvu_HHOR_4H01G415000.1	Horvu_7552_4H01G275300.1	Horvu_8148_4H01G187900.1	Horvu_9043_4H01G276500.1	Horvu_IGRI_4H01G412300.1	HORVU.MOREX.r3.4HG0402620.1	Horvu_OUN333_4H01G040500.1	Horvu_PLANET_4H01G277200.1	Horvu_HUANG_4H01G403000.1	Horvu_CHIBA_4H01G275100.1	KAE8819365.1
						Horvu_AKASHIN_4H01G307000.1	Horvu_FT11_4H01G419100.1	Horvu_BARKE_4H01G280700.1	Horvu_GOLDEN_5H01G206800.1	Horvu_HOCKETT_4H01G400800.1	Horvu_10350_4H01G311900.1	Horvu_13821_4H01G411300.1	Horvu_13942_4H01G414700.1	Horvu_21599_4H01G311600.1	Horvu_3081_4H01G416300.1	Horvu_HHOR_4H01G419600.1	Horvu_7552_4H01G306200.1	Horvu_8148_4H01G279300.1	Horvu_9043_4H01G308800.1	Horvu_IGRI_4H01G417400.1	HORVU.MOREX.r3.4HG0403230.1	Horvu_OUN333_4H01G192000.1	Horvu_PLANET_4H01G308600.1	Horvu_HUANG_4H01G408200.1	Horvu_CHIBA_4H01G306100.1	KAE8788063.1
						Horvu_AKASHIN_4H01G411900.1	Horvu_FT11_4H01G424000.1	Horvu_BARKE_4H01G312200.1	Horvu_GOLDEN_5H01G241800.1	Horvu_HOCKETT_4H01G405700.1	Horvu_10350_4H01G416000.1	Horvu_13821_4H01G416200.1	Horvu_13942_4H01G420000.1	Horvu_21599_4H01G412900.1	Horvu_3081_5H01G232400.1	Horvu_HHOR_5H01G053100.1	Horvu_7552_4H01G409700.1	Horvu_8148_4H01G310400.1	Horvu_9043_4H01G410900.1	Horvu_IGRI_5H01G051000.1	HORVU.MOREX.r3.5HG0428850.1	Horvu_OUN333_4H01G280800.1	Horvu_PLANET_4H01G412800.1	Horvu_HUANG_5H01G047900.1	Horvu_CHIBA_4H01G408400.1	KAE8816016.1
						Horvu_AKASHIN_4H01G416800.1	Horvu_FT11_5H01G054200.1	Horvu_BARKE_4H01G417900.1	Horvu_GOLDEN_5H01G262400.1	Horvu_HOCKETT_5H01G045600.1	Horvu_10350_4H01G420800.1	Horvu_13821_5H01G050200.1	Horvu_13942_5H01G050300.1	Horvu_21599_4H01G418100.1	Horvu_3081_5H01G268300.1	Horvu_HHOR_5H01G227900.1	Horvu_7552_4H01G414700.1	Horvu_8148_4H01G414600.1	Horvu_9043_4H01G415800.1	Horvu_IGRI_5H01G232500.1	HORVU.MOREX.r3.5HG0455060.1	Horvu_OUN333_4H01G312000.1	Horvu_PLANET_4H01G417900.1	Horvu_HUANG_5H01G219300.1	Horvu_CHIBA_4H01G413100.1	KAE8788458.1
						Horvu_AKASHIN_5H01G049800.1	Horvu_FT11_5H01G233500.1	Horvu_BARKE_4H01G422600.1	Horvu_GOLDEN_5H01G275000.1	Horvu_HOCKETT_5H01G219100.1	Horvu_10350_5H01G053800.1	Horvu_13821_5H01G223200.1	Horvu_13942_5H01G226500.1	Horvu_21599_5H01G050100.1	Horvu_3081_5H01G290200.1	Horvu_HHOR_5H01G265900.1	Horvu_7552_5H01G054000.1	Horvu_8148_4H01G419500.1	Horvu_9043_5H01G228800.1	Horvu_IGRI_5H01G269000.1	HORVU.MOREX.r3.5HG0462770.1	Horvu_OUN333_4H01G415500.1	Horvu_PLANET_5H01G053000.1	Horvu_HUANG_5H01G253200.1	Horvu_CHIBA_5H01G053900.1	KAE8806676.1
						Horvu_AKASHIN_5H01G228800.1	Horvu_FT11_5H01G270500.1	Horvu_BARKE_5H01G055600.1	Horvu_GOLDEN_5H01G280300.1	Horvu_HOCKETT_5H01G255000.1	Horvu_10350_5H01G235500.1	Horvu_13821_5H01G257800.1	Horvu_13942_5H01G261900.1	Horvu_21599_5H01G223700.1	Horvu_3081_5H01G303000.1	Horvu_HHOR_5H01G286900.1	Horvu_7552_5H01G229900.1	Horvu_8148_5H01G052800.1	Horvu_9043_5H01G264200.1	Horvu_IGRI_5H01G291300.1	HORVU.MOREX.r3.5HG0469040.1	Horvu_OUN333_4H01G420100.1	Horvu_PLANET_5H01G235800.1	Horvu_HUANG_5H01G275500.1	Horvu_CHIBA_5H01G228400.1	KAE8789340.1
						Horvu_AKASHIN_5H01G263400.1	Horvu_FT11_5H01G292700.1	Horvu_BARKE_5H01G242300.1	Horvu_GOLDEN_5H01G335100.1	Horvu_HOCKETT_5H01G276000.1	Horvu_10350_5H01G271300.1	Horvu_13821_5H01G279900.1	Horvu_13942_5H01G283900.1	Horvu_21599_5H01G259000.1	Horvu_3081_5H01G309200.1	Horvu_HHOR_5H01G300500.1	Horvu_7552_5H01G264600.1	Horvu_8148_5H01G235700.1	Horvu_9043_5H01G285500.1	Horvu_IGRI_5H01G304500.1	HORVU.MOREX.r3.5HG0472530.1	Horvu_OUN333_5H01G053900.1	Horvu_PLANET_5H01G271400.1	Horvu_HUANG_5H01G288300.1	Horvu_CHIBA_5H01G262200.1	KAE8800671.1
						Horvu_AKASHIN_5H01G284400.1	Horvu_FT11_5H01G306000.1	Horvu_BARKE_5H01G277600.1	Horvu_GOLDEN_5H01G464300.1	Horvu_HOCKETT_5H01G289100.1	Horvu_10350_5H01G293300.1	Horvu_13821_5H01G299100.1	Horvu_13942_5H01G296500.1	Horvu_21599_5H01G281300.1	Horvu_3081_5H01G365900.1	Horvu_HHOR_5H01G306800.1	Horvu_7552_5H01G286600.1	Horvu_8148_5H01G271900.1	Horvu_9043_5H01G298400.1	Horvu_IGRI_5H01G310000.1	HORVU.MOREX.r3.5HG0474610.1	Horvu_OUN333_5H01G231700.1	Horvu_PLANET_5H01G293100.1	Horvu_HUANG_5H01G294000.1	Horvu_CHIBA_5H01G284400.1	KAE8809694.1
						Horvu_AKASHIN_5H01G296900.1	Horvu_FT11_5H01G312100.1	Horvu_BARKE_5H01G299100.1	Horvu_GOLDEN_6H01G283800.1	Horvu_HOCKETT_5H01G295000.1	Horvu_10350_5H01G306600.1	Horvu_13821_5H01G355300.1	Horvu_13942_5H01G302300.1	Horvu_21599_5H01G293800.1	Horvu_3081_5H01G503000.1	Horvu_HHOR_5H01G361300.1	Horvu_7552_5H01G298800.1	Horvu_8148_5H01G293000.1	Horvu_9043_5H01G305100.1	Horvu_IGRI_5H01G365800.1	HORVU.MOREX.r3.5HG0475650.1	Horvu_OUN333_5H01G267000.1	Horvu_PLANET_5H01G305600.1	Horvu_HUANG_5H01G348000.1	Horvu_CHIBA_5H01G296500.1	KAE8786572.1
						Horvu_AKASHIN_5H01G302200.1	Horvu_FT11_5H01G365300.1	Horvu_BARKE_5H01G312200.1	Horvu_GOLDEN_6H01G302000.1	Horvu_HOCKETT_5H01G351600.1	Horvu_10350_5H01G314100.1	Horvu_13821_5H01G489700.1	Horvu_13942_5H01G355300.1	Horvu_21599_5H01G300100.1	Horvu_3081_6H01G014000.1	Horvu_HHOR_5H01G494900.1	Horvu_7552_5H01G306100.1	Horvu_8148_5H01G306000.1	Horvu_9043_5H01G361800.1	Horvu_IGRI_5H01G502900.1	HORVU.MOREX.r3.5HG0484760.1	Horvu_OUN333_5H01G288700.1	Horvu_PLANET_5H01G311900.1	Horvu_HUANG_5H01G484500.1	Horvu_CHIBA_5H01G302000.1	KAE8779499.1
						Horvu_AKASHIN_5H01G357700.1	Horvu_FT11_5H01G506400.1	Horvu_BARKE_5H01G318400.1	Horvu_GOLDEN_6H01G367800.1	Horvu_HOCKETT_6H01G297900.1	Horvu_10350_5H01G370500.1	Horvu_13821_6H01G014000.1	Horvu_13942_5H01G491600.1	Horvu_21599_5H01G354800.1	Horvu_3081_6H01G315600.1	Horvu_HHOR_6H01G305400.1	Horvu_7552_5H01G359700.1	Horvu_8148_5H01G312500.1	Horvu_9043_5H01G501400.1	Horvu_IGRI_6H01G313500.1	HORVU.MOREX.r3.5HG0504800.1	Horvu_OUN333_5H01G301200.1	Horvu_PLANET_5H01G368000.1	Horvu_HUANG_6H01G305800.1	Horvu_CHIBA_5H01G355900.1	KAE8820119.1
						Horvu_AKASHIN_5H01G493300.1	Horvu_FT11_6H01G322200.1	Horvu_BARKE_5H01G374100.1	Horvu_GOLDEN_6H01G387500.1	Horvu_HOCKETT_6H01G307500.1	Horvu_10350_5H01G511200.1	Horvu_13821_6H01G310700.1	Horvu_13942_6H01G306200.1	Horvu_21599_5H01G491200.1	Horvu_3081_6H01G324900.1	Horvu_HHOR_6H01G314300.1	Horvu_7552_5H01G495700.1	Horvu_8148_5H01G369300.1	Horvu_9043_6H01G310800.1	Horvu_IGRI_6H01G322800.1	HORVU.MOREX.r3.6HG0593630.1	Horvu_OUN333_5H01G314300.1	Horvu_PLANET_5H01G503400.1	Horvu_HUANG_6H01G317600.1	Horvu_CHIBA_5H01G492000.1	KAE8774001.1
						Horvu_AKASHIN_6H01G305100.1	Horvu_FT11_6H01G332000.1	Horvu_BARKE_5H01G513700.1	Horvu_GOLDEN_6H01G398900.1	Horvu_HOCKETT_6H01G379000.1	Horvu_10350_6H01G319800.1	Horvu_13821_6H01G320200.1	Horvu_13942_6H01G316300.1	Horvu_21599_6H01G314200.1	Horvu_3081_6H01G403700.1	Horvu_HHOR_6H01G389800.1	Horvu_7552_6H01G310900.1	Horvu_8148_5H01G505000.1	Horvu_9043_6H01G321000.1	Horvu_IGRI_6H01G400400.1	HORVU.MOREX.r3.6HG0608030.1	Horvu_OUN333_5H01G360500.1	Horvu_PLANET_6H01G317100.1	Horvu_HUANG_6H01G394400.1	Horvu_CHIBA_6H01G308700.1	KAE8807573.1
						Horvu_AKASHIN_6H01G314900.1	Horvu_FT11_6H01G410100.1	Horvu_BARKE_6H01G322500.1	Horvu_GOLDEN_7H01G111800.1	Horvu_HOCKETT_6H01G403600.1	Horvu_10350_6H01G329300.1	Horvu_13821_6H01G397200.1	Horvu_13942_6H01G393100.1	Horvu_21599_6H01G323800.1	Horvu_3081_6H01G423800.1	Horvu_HHOR_6H01G410700.1	Horvu_7552_6H01G320300.1	Horvu_8148_6H01G317000.1	Horvu_9043_6H01G397900.1	Horvu_IGRI_6H01G421200.1	HORVU.MOREX.r3.6HG0611050.1	Horvu_OUN333_5H01G497600.1	Horvu_PLANET_6H01G327000.1	Horvu_HUANG_6H01G414100.1	Horvu_CHIBA_6H01G317400.1	KAE8788463.1
						Horvu_AKASHIN_6H01G390700.1	Horvu_FT11_6H01G430300.1	Horvu_BARKE_6H01G331700.1	Horvu_GOLDEN_7H01G112200.1	Horvu_HOCKETT_6H01G415100.1	Horvu_10350_6H01G406400.1	Horvu_13821_6H01G417200.1	Horvu_13942_6H01G412100.1	Horvu_21599_6H01G400400.1	Horvu_3081_6H01G435400.1	Horvu_HHOR_6H01G423400.1	Horvu_7552_6H01G395900.1	Horvu_8148_6H01G326700.1	Horvu_9043_6H01G418400.1	Horvu_IGRI_6H01G433000.1	HORVU.MOREX.r3.6HG0612910.1	Horvu_OUN333_6H01G313600.1	Horvu_PLANET_6H01G403000.1	Horvu_HUANG_6H01G426000.1	Horvu_CHIBA_6H01G393400.1	KAE8801465.1
						Horvu_AKASHIN_6H01G411200.1	Horvu_FT11_6H01G442900.1	Horvu_BARKE_6H01G408300.1	Horvu_GOLDEN_7H01G329300.1	Horvu_HOCKETT_7H01G116300.1	Horvu_10350_6H01G427500.1	Horvu_13821_6H01G429300.1	Horvu_13942_6H01G437300.1	Horvu_21599_6H01G421100.1	Horvu_3081_7H01G133400.1	Horvu_HHOR_7H01G128700.1	Horvu_7552_6H01G416100.1	Horvu_8148_6H01G402900.1	Horvu_9043_6H01G431000.1	Horvu_IGRI_7H01G127500.1	HORVU.MOREX.r3.7HG0655900.1	Horvu_OUN333_6H01G322900.1	Horvu_PLANET_6H01G424600.1	Horvu_HUANG_7H01G115700.1	Horvu_CHIBA_6H01G414200.1	KAE8790089.1
						Horvu_AKASHIN_6H01G423800.1	Horvu_FT11_7H01G113000.1	Horvu_BARKE_6H01G429900.1	Horvu_GOLDEN_7H01G335700.1	Horvu_HOCKETT_7H01G116700.1	Horvu_10350_6H01G439700.1	Horvu_13821_7H01G126000.1	Horvu_13942_7H01G127500.1	Horvu_21599_6H01G432800.1	Horvu_3081_7H01G133800.1	Horvu_HHOR_7H01G128900.1	Horvu_7552_6H01G427800.1	Horvu_8148_6H01G423500.1	Horvu_9043_7H01G132600.1	Horvu_IGRI_7H01G127900.1	HORVU.MOREX.r3.7HG0655960.1	Horvu_OUN333_6H01G400200.1	Horvu_PLANET_6H01G437000.1	Horvu_HUANG_7H01G115900.1	Horvu_CHIBA_6H01G427000.1
						Horvu_AKASHIN_7H01G123100.1	Horvu_FT11_7H01G113200.1	Horvu_BARKE_6H01G442300.1	Horvu_GOLDEN_7H01G385300.1	Horvu_HOCKETT_7H01G345600.1	Horvu_10350_7H01G138100.1	Horvu_13821_7H01G126200.1	Horvu_13942_7H01G127900.1	Horvu_21599_7H01G133900.1	Horvu_3081_7H01G359000.1	Horvu_HHOR_7H01G352600.1	Horvu_7552_7H01G129000.1	Horvu_8148_6H01G435300.1	Horvu_9043_7H01G132900.1	Horvu_IGRI_7H01G353300.1	HORVU.MOREX.r3.7HG0693430.1	Horvu_OUN333_6H01G420700.1	Horvu_PLANET_7H01G133400.1	Horvu_HUANG_7H01G338900.1	Horvu_CHIBA_7H01G121900.1
						Horvu_AKASHIN_7H01G123300.1	Horvu_FT11_7H01G354800.1	Horvu_BARKE_7H01G136000.1	Horvu_GOLDEN_7H01G443700.1	Horvu_HOCKETT_7H01G352400.1	Horvu_10350_7H01G138300.1	Horvu_13821_7H01G350600.1	Horvu_13942_7H01G349500.1	Horvu_21599_7H01G134200.1	Horvu_3081_7H01G366300.1	Horvu_HHOR_7H01G359900.1	Horvu_7552_7H01G129200.1	Horvu_8148_7H01G126000.1	Horvu_9043_7H01G358400.1	Horvu_IGRI_7H01G360000.1	HORVU.MOREX.r3.7HG0695240.1	Horvu_OUN333_6H01G433100.1	Horvu_PLANET_7H01G133800.1	Horvu_HUANG_7H01G345500.1	Horvu_CHIBA_7H01G122100.1
						Horvu_AKASHIN_7H01G348900.1	Horvu_FT11_7H01G361100.1	Horvu_BARKE_7H01G136400.1	Horvu_GOLDEN_7H01G489600.1	Horvu_HOCKETT_7H01G402600.1	Horvu_10350_7H01G363800.1	Horvu_13821_7H01G357500.1	Horvu_13942_7H01G356200.1	Horvu_21599_7H01G360300.1	Horvu_3081_7H01G419800.1	Horvu_HHOR_7H01G412400.1	Horvu_7552_7H01G354700.1	Horvu_8148_7H01G126400.1	Horvu_9043_7H01G365300.1	Horvu_IGRI_7H01G413200.1	HORVU.MOREX.r3.7HG0706040.1	Horvu_OUN333_7H01G134500.1	Horvu_PLANET_7H01G362900.1	Horvu_HUANG_7H01G398400.1	Horvu_CHIBA_7H01G349000.1
						Horvu_AKASHIN_7H01G355800.1	Horvu_FT11_7H01G413400.1	Horvu_BARKE_7H01G365200.1	Horvu_GOLDEN_7H01G549000.1	Horvu_HOCKETT_7H01G461800.1	Horvu_10350_7H01G370800.1	Horvu_13821_7H01G411200.1	Horvu_13942_7H01G408500.1	Horvu_21599_7H01G368300.1	Horvu_3081_7H01G478600.1	Horvu_HHOR_7H01G471300.1	Horvu_7552_7H01G360600.1	Horvu_8148_7H01G353400.1	Horvu_9043_7H01G417000.1	Horvu_IGRI_7H01G474000.1	HORVU.MOREX.r3.7HG0716110.1	Horvu_OUN333_7H01G134700.1	Horvu_PLANET_7H01G369100.1	Horvu_HUANG_7H01G457600.1	Horvu_CHIBA_7H01G407200.1
						Horvu_AKASHIN_7H01G409800.1	Horvu_FT11_7H01G474900.1	Horvu_BARKE_7H01G372000.1	Horvu_GOLDEN_Un01G118900.1	Horvu_HOCKETT_7H01G507800.1	Horvu_10350_7H01G424500.1	Horvu_13821_7H01G472100.1	Horvu_13942_7H01G467200.1	Horvu_21599_7H01G420000.1	Horvu_3081_7H01G527900.1	Horvu_HHOR_7H01G520100.1	Horvu_7552_7H01G413400.1	Horvu_8148_7H01G360100.1	Horvu_9043_7H01G475600.1	Horvu_IGRI_7H01G521300.1	HORVU.MOREX.r3.7HG0723550.1	Horvu_OUN333_7H01G361000.1	Horvu_PLANET_7H01G421200.1	Horvu_HUANG_7H01G506800.1	Horvu_CHIBA_7H01G467400.1
						Horvu_AKASHIN_7H01G470800.1	Horvu_FT11_7H01G520600.1	Horvu_BARKE_7H01G424300.1	Horvu_GOLDEN_Un01G124300.1	Horvu_HOCKETT_7H01G572400.1	Horvu_10350_7H01G485400.1	Horvu_13821_7H01G520300.1	Horvu_13942_7H01G514800.1	Horvu_21599_7H01G478300.1	Horvu_3081_7H01G592900.1	Horvu_HHOR_7H01G583800.1	Horvu_7552_7H01G471700.1	Horvu_8148_7H01G412500.1	Horvu_9043_7H01G524000.1	Horvu_IGRI_7H01G586700.1	HORVU.MOREX.r3.7HG0733170.1	Horvu_OUN333_7H01G368000.1	Horvu_PLANET_7H01G486800.1	Horvu_HUANG_7H01G544700.1	Horvu_CHIBA_7H01G513600.1
						Horvu_AKASHIN_7H01G517700.1	Horvu_FT11_7H01G589400.1	Horvu_BARKE_7H01G485100.1	Horvu_GOLDEN_Un01G203600.1	Horvu_HOCKETT_Un01G046200.1	Horvu_10350_7H01G533300.1	Horvu_13821_7H01G586400.1	Horvu_13942_7H01G580800.1	Horvu_21599_7H01G526100.1	Horvu_3081_Un01G044500.1	Horvu_HHOR_Un01G027700.1	Horvu_7552_7H01G520300.1	Horvu_8148_7H01G473600.1	Horvu_9043_7H01G590400.1	Horvu_IGRI_Un01G061000.1		Horvu_OUN333_7H01G421400.1	Horvu_PLANET_7H01G552100.1	Horvu_HUANG_Un01G127700.1	Horvu_CHIBA_7H01G575800.1
						Horvu_AKASHIN_7H01G582600.1		Horvu_BARKE_7H01G533800.1	Horvu_GOLDEN_Un01G210700.1	Horvu_HOCKETT_Un01G083200.1	Horvu_10350_7H01G601300.1	Horvu_13821_Un01G031700.1	Horvu_13942_Un01G051600.1	Horvu_21599_7H01G592000.1			Horvu_7552_7H01G585000.1	Horvu_8148_7H01G521600.1	Horvu_9043_Un01G024600.1	Horvu_IGRI_Un01G072200.1		Horvu_OUN333_7H01G480000.1	Horvu_PLANET_7H01G600800.1		Horvu_CHIBA_Un01G004700.1
								Horvu_BARKE_7H01G601500.1		Horvu_HOCKETT_Un01G183300.1							Horvu_7552_Un01G052400.1	Horvu_8148_7H01G588300.1				Horvu_OUN333_7H01G527700.1			Horvu_CHIBA_Un01G055000.1
										Horvu_HOCKETT_Un01G215700.1												Horvu_OUN333_7H01G595200.1
					PRMT	Horvu_AKASHIN_5H01G298700.1	Horvu_FT11_5H01G308000.1	Horvu_BARKE_5H01G314200.1	Horvu_GOLDEN_5H01G276800.1	Horvu_HOCKETT_5H01G291200.1	Horvu_10350_5H01G308600.1	Horvu_13821_5H01G294600.1	Horvu_13942_5H01G298500.1	Horvu_21599_5H01G295800.1	Horvu_3081_5H01G305000.1	Horvu_HHOR_5H01G302300.1	Horvu_7552_5H01G300800.1	Horvu_8148_5H01G308100.1	Horvu_9043_5H01G300400.1	Horvu_IGRI_5H01G306700.1	HORVU.MOREX.r3.5HG0474900.1	Horvu_OUN333_5H01G303200.1	Horvu_PLANET_5H01G307500.1	Horvu_HUANG_5H01G290200.1	Horvu_CHIBA_5H01G298300.1	KAE8818291.1
						Horvu_AKASHIN_2H01G163600.1	Horvu_FT11_2H01G166300.1	Horvu_BARKE_2H01G173600.1	Horvu_GOLDEN_2H01G142700.1	Horvu_HOCKETT_2H01G148200.1	Horvu_10350_2H01G169600.1	Horvu_13821_2H01G166800.1	Horvu_13942_2H01G165400.1	Horvu_21599_2H01G164000.1	Horvu_3081_2H01G167400.1	Horvu_HHOR_2H01G162000.1	Horvu_7552_2H01G166400.1	Horvu_8148_2H01G169100.1	Horvu_9043_2H01G167000.1	Horvu_IGRI_2H01G166400.1	HORVU.MOREX.r3.2HG0120200.1	Horvu_OUN333_2H01G162600.1	Horvu_PLANET_2H01G167800.1	Horvu_HUANG_2H01G158400.1	Horvu_CHIBA_2H01G163100.1	KAE8778815.1
						Horvu_AKASHIN_2H01G122300.1	Horvu_FT11_2H01G123600.1	Horvu_BARKE_2H01G129700.1	Horvu_GOLDEN_2H01G104400.1	Horvu_HOCKETT_2H01G106100.1	Horvu_10350_2H01G126200.1	Horvu_13821_2H01G124200.1	Horvu_13942_2H01G122100.1	Horvu_21599_2H01G122600.1	Horvu_3081_2H01G123700.1	Horvu_HHOR_2H01G119400.1	Horvu_7552_2H01G123100.1	Horvu_8148_2H01G126100.1	Horvu_9043_2H01G125300.1	Horvu_IGRI_2H01G123400.1	HORVU.MOREX.r3.2HG0113710.1	Horvu_OUN333_2H01G119800.1	Horvu_PLANET_2H01G124900.1	Horvu_HUANG_2H01G114500.1	Horvu_CHIBA_2H01G121300.1	KAE8816274.1
						Horvu_AKASHIN_6H01G114300.1	Horvu_FT11_6H01G123200.1	Horvu_BARKE_6H01G126300.1	Horvu_GOLDEN_6H01G103900.1	Horvu_HOCKETT_6H01G111700.1	Horvu_10350_6H01G122800.1	Horvu_13821_6H01G120300.1	Horvu_13942_6H01G117700.1	Horvu_21599_6H01G123200.1	Horvu_3081_6H01G120000.1	Horvu_HHOR_6H01G117600.1	Horvu_7552_6H01G118000.1	Horvu_8148_6H01G123500.1	Horvu_9043_6H01G118600.1	Horvu_IGRI_6H01G120700.1	HORVU.MOREX.r3.6HG0557080.1	Horvu_OUN333_6H01G117600.1	Horvu_PLANET_6H01G124000.1	Horvu_HUANG_6H01G115400.1	Horvu_CHIBA_6H01G114600.1	KAE8776915.1
						Horvu_AKASHIN_1H01G281500.1	Horvu_FT11_1H01G274300.1	Horvu_BARKE_1H01G281200.1	Horvu_GOLDEN_1H01G228900.1	Horvu_HOCKETT_1H01G254300.1	Horvu_10350_1H01G274200.1	Horvu_13821_1H01G262800.1	Horvu_13942_1H01G260100.1	Horvu_21599_1H01G260700.1	Horvu_3081_1H01G269200.1	Horvu_HHOR_1H01G263700.1	Horvu_7552_1H01G268400.1	Horvu_8148_1H01G264700.1	Horvu_9043_1H01G265100.1	Horvu_IGRI_1H01G267300.1	HORVU.MOREX.r3.1HG0046770.1	Horvu_OUN333_1H01G262300.1	Horvu_PLANET_1H01G272700.1	Horvu_HUANG_1H01G251200.1	Horvu_CHIBA_1H01G269000.1	KAE8783749.1
						Horvu_AKASHIN_2H01G716100.1	Horvu_FT11_2H01G720100.1	Horvu_BARKE_2H01G727800.1	Horvu_GOLDEN_2H01G662500.1	Horvu_HOCKETT_2H01G684100.1	Horvu_10350_2H01G723700.1	Horvu_13821_2H01G713700.1	Horvu_13942_2H01G710800.1	Horvu_21599_2H01G714500.1	Horvu_3081_2H01G719600.1	Horvu_HHOR_2H01G711200.1	Horvu_7552_2H01G713500.1	Horvu_8148_2H01G710800.1	Horvu_9043_2H01G715500.1	Horvu_IGRI_2H01G716600.1	HORVU.MOREX.r3.2HG0210020.1	Horvu_OUN333_2H01G711400.1	Horvu_PLANET_2H01G719700.1	Horvu_HUANG_2H01G708700.1	Horvu_CHIBA_2H01G716100.1	KAE8808267.1
						Horvu_AKASHIN_7H01G080800.1	Horvu_FT11_7H01G067500.1	Horvu_BARKE_7H01G089700.1	Horvu_GOLDEN_7H01G072600.1	Horvu_HOCKETT_7H01G077500.1	Horvu_10350_7H01G090100.1	Horvu_13821_7H01G082600.1	Horvu_13942_7H01G082800.1	Horvu_21599_7H01G088400.1	Horvu_3081_7H01G088200.1	Horvu_HHOR_7H01G083000.1	Horvu_7552_7H01G085500.1	Horvu_8148_7H01G083400.1	Horvu_9043_7H01G084500.1	Horvu_IGRI_7H01G082700.1	HORVU.MOREX.r3.7HG0649260.1	Horvu_OUN333_7H01G089400.1	Horvu_PLANET_7H01G086300.1	Horvu_HUANG_7H01G077800.1	Horvu_CHIBA_7H01G079800.1	KAE8777267.1
					HDMA	Horvu_AKASHIN_2H01G560200.1	Horvu_FT11_2H01G565200.1	Horvu_BARKE_2H01G568600.1	Horvu_GOLDEN_2H01G518700.1	Horvu_HOCKETT_2H01G533400.1	Horvu_10350_2H01G564700.1	Horvu_13821_2H01G560300.1	Horvu_13942_2H01G560100.1	Horvu_21599_2H01G558200.1	Horvu_3081_2H01G561300.1	Horvu_HHOR_2H01G553900.1	Horvu_7552_2H01G560700.1	Horvu_8148_2H01G560200.1	Horvu_9043_2H01G560700.1	Horvu_IGRI_2H01G559900.1	HORVU.MOREX.r3.2HG0188220.1	Horvu_OUN333_2H01G557300.1	Horvu_PLANET_2H01G562500.1	Horvu_HUANG_2H01G554200.1	Horvu_CHIBA_2H01G559800.1	KAE8798910.1
						Horvu_AKASHIN_6H01G455300.1	Horvu_FT11_6H01G470200.1	Horvu_BARKE_6H01G474900.1	Horvu_GOLDEN_6H01G426700.1	Horvu_HOCKETT_6H01G445700.1	Horvu_10350_6H01G469400.1	Horvu_13821_6H01G458900.1	Horvu_13942_6H01G455400.1	Horvu_21599_6H01G462700.1	Horvu_3081_6H01G464300.1	Horvu_HHOR_6H01G454300.1	Horvu_7552_6H01G458400.1	Horvu_8148_6H01G465300.1	Horvu_9043_6H01G461400.1	Horvu_IGRI_6H01G462100.1	HORVU.MOREX.r3.6HG0617270.1	Horvu_OUN333_6H01G463200.1	Horvu_PLANET_6H01G467800.1	Horvu_HUANG_6H01G457300.1	Horvu_CHIBA_6H01G458000.1	KAE8775295.1
						Horvu_AKASHIN_7H01G384200.1	Horvu_FT11_7H01G388000.1	Horvu_BARKE_7H01G399300.1	Horvu_GOLDEN_7H01G362400.1	Horvu_HOCKETT_7H01G379200.1	Horvu_10350_7H01G399400.1	Horvu_13821_7H01G386200.1	Horvu_13942_7H01G384300.1	Horvu_21599_7H01G395400.1	Horvu_3081_7H01G394300.1	Horvu_HHOR_7H01G387300.1	Horvu_7552_7H01G389000.1	Horvu_8148_7H01G388200.1	Horvu_9043_7H01G393400.1	Horvu_IGRI_7H01G388000.1	HORVU.MOREX.r3.7HG0701580.1	Horvu_OUN333_7H01G396400.1	Horvu_PLANET_7H01G396200.1	Horvu_HUANG_7H01G373900.1	Horvu_CHIBA_7H01G382800.1	KAE8783139.1
						Horvu_AKASHIN_6H01G557300.1	Horvu_FT11_6H01G570800.1	Horvu_BARKE_6H01G573100.1	Horvu_GOLDEN_6H01G518300.1	Horvu_HOCKETT_6H01G538700.1	Horvu_10350_6H01G587100.1	Horvu_13821_6H01G560200.1	Horvu_13942_6H01G555700.1	Horvu_21599_6H01G559300.1	Horvu_3081_6H01G569500.1	Horvu_HHOR_6H01G552400.1	Horvu_7552_6H01G558000.1	Horvu_8148_6H01G565300.1	Horvu_9043_6H01G560700.1	Horvu_IGRI_6H01G562200.1	HORVU.MOREX.r3.6HG0631680.1	Horvu_OUN333_6H01G561400.1	Horvu_PLANET_6H01G568900.1	Horvu_HUANG_6H01G554700.1	Horvu_CHIBA_6H01G559000.1	KAE8779832.1
					JMJ	Horvu_AKASHIN_1H01G143000.1	Horvu_FT11_1H01G151100.1	Horvu_BARKE_1H01G153200.1	Horvu_GOLDEN_1H01G117600.1	Horvu_HOCKETT_1H01G139000.1	Horvu_10350_1H01G148700.1	Horvu_13821_1H01G143000.1	Horvu_13942_1H01G141200.1	Horvu_21599_1H01G141800.1	Horvu_3081_1H01G142400.1	Horvu_HHOR_1H01G147200.1	Horvu_7552_1H01G145800.1	Horvu_8148_1H01G142600.1	Horvu_9043_1H01G143900.1	Horvu_IGRI_1H01G143200.1	HORVU.MOREX.r3.4HG0411310.1	Horvu_OUN333_1H01G144300.1	Horvu_PLANET_1H01G147000.1	Horvu_HUANG_1H01G136400.1	Horvu_CHIBA_1H01G131400.1	KAE8803556.1
						Horvu_AKASHIN_1H01G194500.1	Horvu_FT11_1H01G205000.1	Horvu_BARKE_1H01G211400.1	Horvu_GOLDEN_1H01G163200.1	Horvu_HOCKETT_1H01G187600.1	Horvu_10350_1H01G206200.1	Horvu_13821_1H01G193500.1	Horvu_13942_1H01G191700.1	Horvu_21599_1H01G192500.1	Horvu_3081_1H01G199600.1	Horvu_HHOR_1H01G196300.1	Horvu_7552_1H01G199700.1	Horvu_8148_1H01G195200.1	Horvu_9043_1H01G195200.1	Horvu_IGRI_1H01G198900.1	HORVU.MOREX.r3.5HG0454080.1	Horvu_OUN333_1H01G193400.1	Horvu_PLANET_1H01G203900.1	Horvu_HUANG_1H01G183600.1	Horvu_CHIBA_1H01G185400.1	KAE8791516.1
						Horvu_AKASHIN_1H01G582100.1	Horvu_FT11_1H01G592200.1	Horvu_BARKE_1H01G600700.1	Horvu_GOLDEN_1H01G528900.1	Horvu_HOCKETT_1H01G562500.1	Horvu_10350_1H01G595500.1	Horvu_13821_1H01G581900.1	Horvu_13942_1H01G575400.1	Horvu_21599_1H01G576800.1	Horvu_3081_1H01G585500.1	Horvu_HHOR_1H01G580500.1	Horvu_7552_1H01G582000.1	Horvu_8148_1H01G582100.1	Horvu_9043_1H01G581400.1	Horvu_IGRI_1H01G578500.1	HORVU.MOREX.r3.3HG0307960.1	Horvu_OUN333_1H01G579500.1	Horvu_PLANET_1H01G588100.1	Horvu_HUANG_1H01G566600.1	Horvu_CHIBA_1H01G567300.1	KAE8791606.1
						Horvu_AKASHIN_2H01G492100.1	Horvu_FT11_2H01G497200.1	Horvu_BARKE_2H01G500400.1	Horvu_GOLDEN_2H01G451900.1	Horvu_HOCKETT_2H01G468900.1	Horvu_10350_2H01G497600.1	Horvu_13821_2H01G490700.1	Horvu_13942_2H01G490500.1	Horvu_21599_2H01G490600.1	Horvu_3081_2H01G491800.1	Horvu_HHOR_2H01G485100.1	Horvu_7552_2H01G492800.1	Horvu_8148_2H01G493300.1	Horvu_9043_2H01G494500.1	Horvu_IGRI_2H01G492500.1	HORVU.MOREX.r3.1HG0053590.1	Horvu_OUN333_2H01G488900.1	Horvu_PLANET_2H01G494300.1	Horvu_HUANG_2H01G484900.1	Horvu_CHIBA_2H01G491200.1	KAE8794745.1
						Horvu_AKASHIN_3H01G284800.1	Horvu_FT11_3H01G291600.1	Horvu_BARKE_3H01G287600.1	Horvu_GOLDEN_3H01G266500.1	Horvu_HOCKETT_3H01G275000.1	Horvu_10350_3H01G283700.1	Horvu_13821_3H01G282100.1	Horvu_13942_3H01G282100.1	Horvu_21599_3H01G286200.1	Horvu_3081_3H01G279500.1	Horvu_HHOR_3H01G282500.1	Horvu_7552_3H01G286100.1	Horvu_8148_3H01G286300.1	Horvu_9043_3H01G277900.1	Horvu_IGRI_3H01G279700.1	HORVU.MOREX.r3.6HG0605960.1	Horvu_OUN333_3H01G281500.1	Horvu_PLANET_3H01G288800.1	Horvu_HUANG_3H01G274200.1	Horvu_CHIBA_3H01G279200.1	KAE8773333.1
						Horvu_AKASHIN_3H01G441500.1	Horvu_FT11_3H01G452600.1	Horvu_BARKE_3H01G443400.1	Horvu_GOLDEN_3H01G418200.1	Horvu_HOCKETT_3H01G429300.1	Horvu_10350_3H01G443100.1	Horvu_13821_3H01G437800.1	Horvu_13942_3H01G438900.1	Horvu_21599_3H01G445200.1	Horvu_3081_3H01G437000.1	Horvu_HHOR_3H01G437400.1	Horvu_7552_3H01G444500.1	Horvu_8148_3H01G443200.1	Horvu_9043_3H01G435400.1	Horvu_IGRI_3H01G437000.1	HORVU.MOREX.r3.1HG0032910.1	Horvu_OUN333_3H01G442400.1	Horvu_PLANET_3H01G447600.1	Horvu_HUANG_3H01G433200.1	Horvu_CHIBA_3H01G436400.1	KAE8779083.1
						Horvu_AKASHIN_3H01G552200.1	Horvu_FT11_3H01G564800.1	Horvu_BARKE_3H01G555300.1	Horvu_GOLDEN_4H01G445400.1	Horvu_HOCKETT_3H01G539300.1	Horvu_10350_3H01G555200.1	Horvu_13821_3H01G549300.1	Horvu_13942_4H01G480100.1	Horvu_21599_3H01G555900.1	Horvu_3081_4H01G475700.1	Horvu_HHOR_4H01G478800.1	Horvu_7552_3H01G558000.1	Horvu_8148_4H01G480000.1	Horvu_9043_3H01G547400.1	Horvu_IGRI_4H01G474800.1	HORVU.MOREX.r3.1HG0093770.1	Horvu_OUN333_4H01G479600.1	Horvu_PLANET_3H01G558400.1	Horvu_HUANG_3H01G543500.1	Horvu_CHIBA_3H01G552200.1	KAE8794178.1
						Horvu_AKASHIN_4H01G475900.1	Horvu_FT11_4H01G482400.1	Horvu_BARKE_4H01G484200.1	Horvu_GOLDEN_5H01G163700.1	Horvu_HOCKETT_4H01G466500.1	Horvu_10350_4H01G479500.1	Horvu_13821_4H01G475500.1	Horvu_13942_5H01G179400.1	Horvu_21599_4H01G478400.1	Horvu_3081_5H01G187300.1	Horvu_HHOR_5H01G182600.1	Horvu_7552_4H01G472400.1	Horvu_8148_5H01G187400.1	Horvu_9043_4H01G473700.1	Horvu_IGRI_5H01G185800.1	HORVU.MOREX.r3.7HG0752360.1	Horvu_OUN333_5H01G185300.1	Horvu_PLANET_4H01G478600.1	Horvu_HUANG_4H01G466300.1	Horvu_CHIBA_4H01G473000.1	KAE8769237.1
						Horvu_AKASHIN_5H01G179900.1	Horvu_FT11_5H01G189600.1	Horvu_BARKE_5H01G195200.1	Horvu_GOLDEN_5H01G242600.1	Horvu_HOCKETT_5H01G169700.1	Horvu_10350_5H01G197800.1	Horvu_13821_5H01G178100.1	Horvu_13942_5H01G262700.1	Horvu_21599_5H01G176000.1	Horvu_3081_5H01G269100.1	Horvu_HHOR_5H01G266700.1	Horvu_7552_5H01G181600.1	Horvu_8148_5H01G272700.1	Horvu_9043_5H01G192100.1	Horvu_IGRI_5H01G269800.1	HORVU.MOREX.r3.4HG0375930.1	Horvu_OUN333_5H01G267800.1	Horvu_PLANET_5H01G189300.1	Horvu_HUANG_5H01G171100.1	Horvu_CHIBA_5H01G178500.1	KAE8811734.1
						Horvu_AKASHIN_5H01G264300.1	Horvu_FT11_5H01G271400.1	Horvu_BARKE_5H01G278400.1	Horvu_GOLDEN_5H01G298600.1	Horvu_HOCKETT_5H01G255800.1	Horvu_10350_5H01G272200.1	Horvu_13821_5H01G258500.1	Horvu_13942_5H01G319700.1	Horvu_21599_5H01G259700.1	Horvu_3081_5H01G327800.1	Horvu_HHOR_5H01G324700.1	Horvu_7552_5H01G265400.1	Horvu_8148_5H01G331800.1	Horvu_9043_5H01G265100.1	Horvu_IGRI_5H01G328000.1	HORVU.MOREX.r3.1HG0024370.1	Horvu_OUN333_5H01G325800.1	Horvu_PLANET_5H01G272200.1	Horvu_HUANG_5H01G254000.1	Horvu_CHIBA_5H01G263100.1	KAE8773551.1
						Horvu_AKASHIN_5H01G321000.1	Horvu_FT11_5H01G329700.1	Horvu_BARKE_5H01G336800.1	Horvu_GOLDEN_5H01G372200.1	Horvu_HOCKETT_5H01G314700.1	Horvu_10350_5H01G332400.1	Horvu_13821_5H01G317600.1	Horvu_13942_5H01G394500.1	Horvu_21599_5H01G318300.1	Horvu_3081_5H01G404000.1	Horvu_HHOR_5H01G399000.1	Horvu_7552_5H01G324100.1	Horvu_8148_5H01G407200.1	Horvu_9043_5H01G323700.1	Horvu_IGRI_5H01G404500.1	HORVU.MOREX.r3.6HG0542720.1	Horvu_OUN333_5H01G399100.1	Horvu_PLANET_5H01G330500.1	Horvu_HUANG_5H01G313400.1	Horvu_CHIBA_5H01G320300.1	KAE8801548.1
						Horvu_AKASHIN_5H01G394000.1	Horvu_FT11_5H01G403700.1	Horvu_BARKE_5H01G412400.1	Horvu_GOLDEN_5H01G375000.1	Horvu_HOCKETT_5H01G389500.1	Horvu_10350_5H01G410000.1	Horvu_13821_5H01G394900.1	Horvu_13942_5H01G397500.1	Horvu_21599_5H01G392300.1	Horvu_3081_5H01G407100.1	Horvu_HHOR_5H01G402100.1	Horvu_7552_5H01G398000.1	Horvu_8148_5H01G410400.1	Horvu_9043_5H01G401300.1	Horvu_IGRI_5H01G407900.1	HORVU.MOREX.r3.5HG0478600.1	Horvu_OUN333_5H01G402100.1	Horvu_PLANET_5H01G406500.1	Horvu_HUANG_5H01G389200.1	Horvu_CHIBA_5H01G392200.1	KAE8774179.1
						Horvu_AKASHIN_5H01G397000.1	Horvu_FT11_5H01G406900.1	Horvu_BARKE_5H01G415700.1	Horvu_GOLDEN_6H01G020800.1	Horvu_HOCKETT_5H01G392700.1	Horvu_10350_5H01G413300.1	Horvu_13821_5H01G398100.1	Horvu_13942_6H01G026400.1	Horvu_21599_5H01G395300.1	Horvu_3081_6H01G028000.1	Horvu_HHOR_6H01G025500.1	Horvu_7552_5H01G401200.1	Horvu_8148_6H01G029000.1	Horvu_9043_5H01G404600.1	Horvu_IGRI_6H01G028100.1	HORVU.MOREX.r3.3HG0292650.1	Horvu_OUN333_6H01G026500.1	Horvu_PLANET_5H01G409900.1	Horvu_HUANG_6H01G022000.1	Horvu_CHIBA_5H01G395400.1	KAE8798962.1
						Horvu_AKASHIN_6H01G023200.1	Horvu_FT11_6H01G032400.1	Horvu_BARKE_6H01G014200.1	Horvu_GOLDEN_6H01G355100.1	Horvu_HOCKETT_6H01G023600.1	Horvu_10350_6H01G029200.1	Horvu_13821_6H01G027800.1	Horvu_13942_6H01G379600.1	Horvu_21599_6H01G028700.1	Horvu_3081_6H01G389700.1	Horvu_HHOR_6H01G377700.1	Horvu_7552_6H01G024800.1	Horvu_8148_6H01G389800.1	Horvu_9043_6H01G028000.1	Horvu_IGRI_6H01G386800.1	HORVU.MOREX.r3.5HG0490430.1	Horvu_OUN333_6H01G387100.1	Horvu_PLANET_6H01G031700.1	Horvu_HUANG_6H01G380900.1	Horvu_CHIBA_6H01G023700.1	KAE8786272.1
						Horvu_AKASHIN_6H01G377600.1	Horvu_FT11_6H01G397500.1	Horvu_BARKE_6H01G394600.1	Horvu_GOLDEN_7H01G259000.1	Horvu_HOCKETT_6H01G384400.1	Horvu_10350_6H01G392800.1	Horvu_13821_6H01G383900.1	Horvu_13942_7H01G278100.1	Horvu_21599_6H01G386700.1	Horvu_3081_7H01G285800.1	Horvu_HHOR_7H01G282600.1	Horvu_7552_6H01G382800.1	Horvu_8148_7H01G281500.1	Horvu_9043_6H01G384400.1	Horvu_IGRI_7H01G280700.1	HORVU.MOREX.r3.7HG0731150.1	Horvu_OUN333_7H01G287000.1	Horvu_PLANET_6H01G389400.1	Horvu_HUANG_7H01G266200.1	Horvu_CHIBA_6H01G380000.1	KAE8804983.1
						Horvu_AKASHIN_7H01G275000.1	Horvu_FT11_7H01G271600.1	Horvu_BARKE_7H01G291600.1	Horvu_GOLDEN_7H01G537700.1	Horvu_HOCKETT_7H01G271800.1	Horvu_10350_7H01G292400.1	Horvu_13821_7H01G278300.1	Horvu_13942_7H01G568100.1	Horvu_21599_7H01G288500.1	Horvu_3081_7H01G580700.1	Horvu_HHOR_7H01G570800.1	Horvu_7552_7H01G279700.1	Horvu_8148_7H01G575500.1	Horvu_9043_7H01G285500.1	Horvu_IGRI_7H01G573000.1	HORVU.MOREX.r3.5HG0490830.1	Horvu_OUN333_7H01G582400.1	Horvu_PLANET_7H01G290100.1	Horvu_HUANG_7H01G559500.1	Horvu_CHIBA_7H01G274200.1	KAE8777368.1
						Horvu_AKASHIN_7H01G570700.1	Horvu_FT11_7H01G576600.1	Horvu_BARKE_7H01G588300.1	Horvu_GOLDEN_7H01G653200.1	Horvu_HOCKETT_7H01G559800.1	Horvu_10350_7H01G588200.1	Horvu_13821_7H01G573500.1	Horvu_13942_Un01G028800.1	Horvu_21599_7H01G579600.1	Horvu_3081_7H01G713000.1	Horvu_HHOR_7H01G706800.1	Horvu_7552_7H01G573400.1	Horvu_8148_7H01G711000.1	Horvu_9043_7H01G577200.1	Horvu_IGRI_7H01G707500.1	HORVU.MOREX.r3.2HG0178050.1	Horvu_OUN333_7H01G716800.1	Horvu_PLANET_7H01G499400.1	Horvu_HUANG_Un01G083700.1	Horvu_CHIBA_7H01G563900.1	KAE8784994.1
						Horvu_AKASHIN_7H01G701800.1	Horvu_FT11_7H01G714300.1	Horvu_BARKE_7H01G728200.1		Horvu_HOCKETT_7H01G695100.1	Horvu_10350_7H01G722800.1	Horvu_13821_7H01G703800.1	Horvu_13942_Un01G045700.1	Horvu_21599_7H01G709300.1	Horvu_3081_Un01G029600.1	Horvu_HHOR_Un01G021300.1	Horvu_7552_7H01G704600.1	Horvu_8148_Un01G031400.1	Horvu_9043_7H01G709000.1	Horvu_IGRI_Un01G050700.1	HORVU.MOREX.r3.3HG0266450.1		Horvu_PLANET_7H01G721500.1	Horvu_HUANG_Un01G118200.1	Horvu_CHIBA_7H01G694700.1
																					HORVU.MOREX.r3.5HG0469230.1

## Sheet: Table S2
Table S2. Renaming of HMT and HDM family members in Morex
HMT	PRMT	HORVU.MOREX.r3.5HG0474900.1	HvPRMT1
		HORVU.MOREX.r3.2HG0120200.1	HvPRMT3
		HORVU.MOREX.r3.2HG0113710.1	HvPRMT4
		HORVU.MOREX.r3.6HG0557080.1	HvPRMT5
		HORVU.MOREX.r3.1HG0046770.1	HvPRMT6a
		HORVU.MOREX.r3.2HG0210020.1	HvPRMT6b
		HORVU.MOREX.r3.7HG0649260.1	HvPRMT10
	SET	HORVU.MOREX.r3.1HG0008950.1	HvSET1
		HORVU.MOREX.r3.1HG0027530.1	HvSET2
		HORVU.MOREX.r3.1HG0058810.1	HvSET3
		HORVU.MOREX.r3.1HG0069800.1	HvSET4
		HORVU.MOREX.r3.1HG0080510.1	HvSET5
		HORVU.MOREX.r3.1HG0093330.1	HvSET6
		HORVU.MOREX.r3.1HG0093350.1	HvSET7
		HORVU.MOREX.r3.2HG0096180.1	HvSET8
		HORVU.MOREX.r3.2HG0146930.1	HvSET9
		HORVU.MOREX.r3.2HG0168260.1	HvSET10
		HORVU.MOREX.r3.2HG0185400.1	HvSET11
		HORVU.MOREX.r3.2HG0198730.1	HvSET12
		HORVU.MOREX.r3.2HG0199050.1	HvSET13
		HORVU.MOREX.r3.2HG0218020.1	HvSET14
		HORVU.MOREX.r3.3HG0244900.1	HvSET15
		HORVU.MOREX.r3.3HG0276610.1	HvSET16
		HORVU.MOREX.r3.3HG0292400.1	HvSET17
		HORVU.MOREX.r3.3HG0296030.1	HvSET18
		HORVU.MOREX.r3.3HG0299940.1	HvSET19
		HORVU.MOREX.r3.3HG0312220.1	HvSET20
		HORVU.MOREX.r3.3HG0314220.1	HvSET21
		HORVU.MOREX.r3.3HG0315050.1	HvSET22
		HORVU.MOREX.r3.3HG0325840.1	HvSET23
		HORVU.MOREX.r3.4HG0336430.1	HvSET24
		HORVU.MOREX.r3.4HG0382250.1	HvSET25
		HORVU.MOREX.r3.4HG0387030.1	HvSET26
		HORVU.MOREX.r3.4HG0402620.1	HvSET27
		HORVU.MOREX.r3.4HG0403230.1	HvSET28
		HORVU.MOREX.r3.5HG0428850.1	HvSET29
		HORVU.MOREX.r3.5HG0455060.1	HvSET30
		HORVU.MOREX.r3.5HG0462770.1	HvSET31
		HORVU.MOREX.r3.5HG0469040.1	HvSET32
		HORVU.MOREX.r3.5HG0472530.1	HvSET33
		HORVU.MOREX.r3.5HG0474610.1	HvSET34
		HORVU.MOREX.r3.5HG0475650.1	HvSET35
		HORVU.MOREX.r3.5HG0484760.1	HvSET36
		HORVU.MOREX.r3.5HG0504800.1	HvSET37
		HORVU.MOREX.r3.6HG0593630.1	HvSET38
		HORVU.MOREX.r3.6HG0608030.1	HvSET39
		HORVU.MOREX.r3.6HG0611050.1	HvSET40
		HORVU.MOREX.r3.6HG0612910.1	HvSET41
		HORVU.MOREX.r3.7HG0655900.1	HvSET42
		HORVU.MOREX.r3.7HG0655960.1	HvSET43
		HORVU.MOREX.r3.7HG0693430.1	HvSET44
		HORVU.MOREX.r3.7HG0695240.1	HvSET45
		HORVU.MOREX.r3.7HG0706040.1	HvSET46
		HORVU.MOREX.r3.7HG0716110.1	HvSET47
		HORVU.MOREX.r3.7HG0723550.1	HvSET48
		HORVU.MOREX.r3.7HG0733170.1	HvSET49
HDM	HDMA	HORVU.MOREX.r3.2HG0188220.1	HvFLD
		HORVU.MOREX.r3.6HG0617270.1	HvLDL1
		HORVU.MOREX.r3.7HG0701580.1	HvLDL2
		HORVU.MOREX.r3.6HG0631680.1	HvLDL3
	JMJ	HORVU.MOREX.r3.4HG0411310.1	HvJMJ1
		HORVU.MOREX.r3.5HG0454080.1	HvJMJ2
		HORVU.MOREX.r3.3HG0307960.1	HvJMJ3
		HORVU.MOREX.r3.1HG0053590.1	HvJMJ4
		HORVU.MOREX.r3.6HG0605960.1	HvJMJ5
		HORVU.MOREX.r3.1HG0032910.1	HvJMJ6
		HORVU.MOREX.r3.1HG0093770.1	HvJMJ7
		HORVU.MOREX.r3.7HG0752360.1	HvJMJ8
		HORVU.MOREX.r3.4HG0375930.1	HvJMJ9
		HORVU.MOREX.r3.1HG0024370.1	HvJMJ10
		HORVU.MOREX.r3.6HG0542720.1	HvJMJ11
		HORVU.MOREX.r3.5HG0478600.1	HvJMJ12
		HORVU.MOREX.r3.2HG0178050.1	HvJMJ13
		HORVU.MOREX.r3.3HG0266450.1	HvJMJ14
		HORVU.MOREX.r3.3HG0292650.1	HvJMJ15
		HORVU.MOREX.r3.5HG0469230.1	HvJMJ16
		HORVU.MOREX.r3.5HG0490430.1	HvJMJ17
		HORVU.MOREX.r3.5HG0490830.1	HvJMJ18
		HORVU.MOREX.r3.7HG0731150.1	HvJMJ19

## Sheet: Table S3
	Table S3. Number of SDG subfamily members in different groups of Morex, B1K-04-12 and Lasa Goumang
		Morex	B1K-04-12	Lasa Goumang
	Class 1	3	3	2
	Class 4	1	1	2
	Class 2	6	6	1
	Class 3	6	6	5
	Class 6/7	12	11	9
	Class 5	20	22	22
	Total	49	50	42

## Sheet: Table S4
Table S4. Differentially expressed genes under different stresses in barley
		Cold	Drought	Salt	Waterlogger
HvHMTs	HvPRMTs	HvPRMT1	HvPRMT3	HvPRMT3
		HvPRMT3	HvPRMT10	HvPRMT10
		HvPRMT4
		HvPRMT5
		HvPRMT6a
		HvPRMT10
	HvSETs	HvSET6	HvSET4	HvSET1	HvSET4
		HvSET7	HvSET13	HvSET6	HvSET12
		HvSET8	HvSET20	HvSET9	HvSET13
		HvSET13	HvSET21	HvSET11	HvSET34
		HvSET14	HvSET22	HvSET15	HvSET40
		HvSET18	HvSET37	HvSET20	HvSET43
		HvSET20	HvSET41	HvSET21	HvSET47
		HvSET22		HvSET27
		HvSET23		HvSET28
		HvSET25		HvSET34
		HvSET27		HvSET37
		HvSET29		HvSET38
		HvSET41		HvSET42
				HvSET43
				HvSET47
				HvSET48
				HvSET49
HvHDMs	HvHDMAs	HvFLD		HvLDL1	HvLDL1
		HvLDL2		HvLDL2	HvLDL3
				HvLDL3
	HvJMJs	HvJMJ2	HvJMJ4	HvJMJ1	HvJMJ2
		HvJMJ4			HvJMJ3
		HvJMJ5			HvJMJ5
		HvJMJ6			HvJMJ6
				HvJMJ2
				HvJMJ4
				HvJMJ6
				HvJMJ7
				HvJMJ10
				HvJMJ12

## Sheet: TableS5
Table S5. Primers of HvHMTs and HvHDMs genes used for qRT-PCR.
Gene name	Forward primer (5`- 3`)	Reverse primer (5`- 3`)
HvSET4	TCGGTTGCTCAGACTTCG	GCTTCCACAGCCTCCCTA
HvSET7	GTGACCTCCCTGCCATAC	AGGCTCGTCGGAATCTAG
HvSET47	AAGATGAGGAGCATGGGAAGG	ATGGGACAGCTCACCGTTTG
HvPRMT3	TTGGGTAGCCACAGAAGAC	TGGGCGACAAAGTAAGAA
HvPRMT5	CAGGCCGCAGAAGAAACT	CCAAATGACCCAAGCAACT
HvPRMT10	ACATTGCCAATCAACCAGG	GAACCATCGAGAACGAAACA
HvLDL1	TATCGCAGATAGTGTCCCACA	GGTCACCACCCATTTCGT
HvLDL3	AAGGAATCCCAATGATAAAG	TCTACTGGTCTCCACGTCTT
HvFLD	GACATATTAGCCGAAAGTGTTG	AAGCCTGAGCGTTTGTAGAT
HvJMJ2	AATAGTTATCTGTAGCCCATCA	TTCATCATTAGCGGAGCA
HvJMJ4	GTGCCCAGAACAATAATCC	TCCTTCATCAGCACGACA
HvJMJ6	TGTCTAAGCGTACACCTCC	TTGTTCTTCTGGGCATTT
